# Supplementary material for: Abundant Quantitative Trait Loci Exist for DNA Methylation and Gene Expression in Human Brain
Source: PLOS journal article supplement (doi:10.1371/journal.pgen.1000952), 2010-05-13

# Population MDS by Genotype

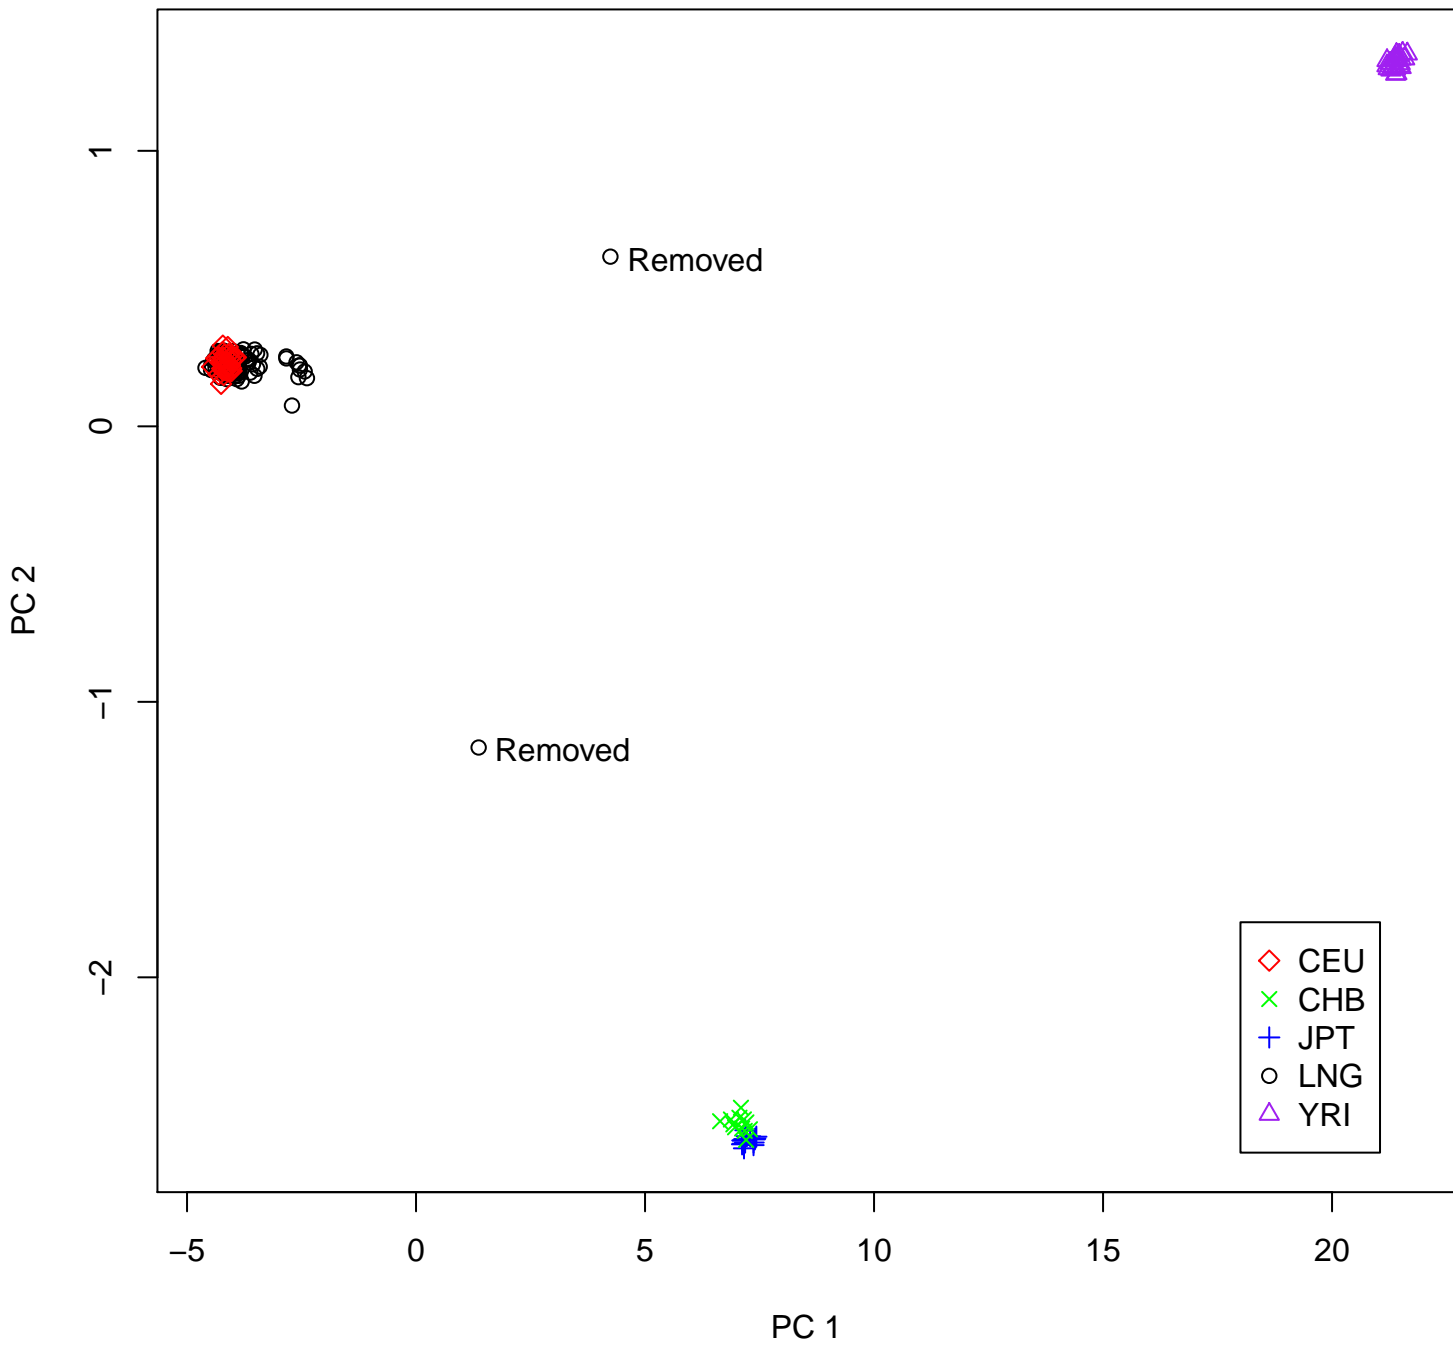

Supplement: S1 (10.1371/journal.pgen.1000952.s001) [file journal.pgen.1000952.s001]
